# Supplementary material for: Stem cell regionalization during olfactory bulb neurogenesis depends on regulatory interactions between Vax1 and Pax6
Source: eLife. 2020 Aug 7;9:e58215. doi: 10.7554/eLife.58215 (PMC7440913; doi:10.7554/eLife.58215)
Supplement: Figure 2—figure supplement 2—source data 1. [file elife-58215-fig2-figsupp2-data1.xlsx]

## Sheet: Fig2 sup 2
	Figure 2- supplement figure 2. Vax1 inactivation in lateral V-SVZ progenitors does not affect the number of Periglomerular cells (PGC) in the olfactory bulb
	Mean of Tom+ PGC cells/mm2
	Vax1;Ai14
	# of litter	# of mice	WT	# of litter	# of mice	mutant
	1	1-1	111	5	5-1	28
		1-2	190		5-2	76
		1-3	45		5-3	43
		1-4	95	6	6-1	163
		1-5	135		6-2	39
		1-6	172		6-3	31
	2	2-1	25	7	7-1	18
		2-2	89		7-2	19
	3	3-1	165		7-3	56
		3-2	132	8	8-1	210
		3-3	127		8-2	216
		3-4	110		8-3	169
					8-4	238
					8-5	65
				9	9-1	263
					9-2	168
					9-3	103
	Quantification of tdTomato+ cells in the Glomerularr layer of P15 Vax1wt;Ai14 and Vax1flox/flox;Ai14 animals
	Each value represents the mean of several sections analyzed per animal
	Independent litters were used to performed CRE electroporation in WT or Vax1cKO animals
	The animals are the same as analyzed in Figure 2C
	WT: 3 litters, n=12
	Vax1cKO: 5 litters, n=17
