# Supplementary material for: Stem cell regionalization during olfactory bulb neurogenesis depends on regulatory interactions between Vax1 and Pax6
Source: eLife. 2020 Aug 7;9:e58215. doi: 10.7554/eLife.58215 (PMC7440913; doi:10.7554/eLife.58215)
Supplement: Figure 2—source data 1. [file elife-58215-fig2-data1.xlsx]

## Sheet: Figure 2C
Figure 2C. Vax1 inactivation in lateral V-SVZ progenitors does not affect the number of Granule Cell (GC) in the olfactory bulb
	Mean of Tom+ GC cells/mm2
	Vax1;Ai14
	# of litter	# of mice	WT	# of litter	# of mice	mutant
	1	1-1	610	5	5-1	343
		1-2	1214		5-2	617
		1-3	634		5-3	399
		1-4	732	6	6-1	865
		1-5	1075		6-2	255
		1-6	1320		6-3	375
	2	2-1	246	7	7-1	113
		2-2	389		7-2	257
	3	3-1	759		7-3	305
		3-2	669	8	8-1	1326
		3-3	795		8-2	1122
		3-4	807		8-3	917
					8-4	1582
					8-5	630
				9	9-1	1678
					9-2	1304
					9-3	855
	Quantification of tdTomato+ cells in the Granular layer of P15 Vax1wt;Ai14 and Vax1flox/flox;Ai14 animals
	Each value represents the mean of several sections analyzed per animal
	Independent litters were used to performed CRE electroporation in WT or Vax1cKO animals
	WT: 3 litters, n=12
	Vax1cKO: 5 litters, n=17

## Sheet: Figure 2E
	Figure 2E. Vax1 inactivation in lateral V-SVZ progenitors reduces the percentage of Calbindin+ Periglomerular neurons in P15 OB
	% of Calb+ Tom+ cells related to the number of Tom+ PGC
	Vax1;Ai14
	# of litter	# of mice	WT	# of litter	# of mice	mutant
	1	1-1	4	4	4-1	3.30189
		1-2	2.15054		4-2	6.45161
	2	2-1	5.5794		4-3	9.7561
		2-2	14.2857	5	5-1	0
		2-3	7.89474		5-2	2.63158
		2-4	8.0292		5-3	0
		2-5	6.33803		5-4	1.06383
	3	3-1	0	6	6-1	3.94737
		3-2	1.11111		6-2	7.07965
		3-3	1.02041	7	7-1	0.743494
		3-4	2.77778		7-2	0.396825
					7-3	0.50505
					7-4	0.292398
					7-5	0
				8	8-1	0.337838
					8-2	0
					8-3	0
	Quantification of Calbindin+ Tom+ PGC number related to the total number of Tom+ cells in the GL at P15
	Each value represents the mean of several sections analyzed per animal
	Independant litters were used to performed CRE electroporation in WT or Vax1cKO animals
	WT: 3 litters, n=12
	Vax1cKO: 5 litters, n=17
