# Supplementary material for: Stem cell regionalization during olfactory bulb neurogenesis depends on regulatory interactions between Vax1 and Pax6
Source: eLife. 2020 Aug 7;9:e58215. doi: 10.7554/eLife.58215 (PMC7440913; doi:10.7554/eLife.58215)
Supplement: Figure 3—source data 1. [file elife-58215-fig3-data1.xlsx]

## Sheet: Figure 3E
	Figure 3E: Vax1 overexpression leads to reduced Pax6+ intensity level in the V-SVZ at 2dpe
	Pax6 mean intensity measured in V-SVZ GFP+ cells
	Lateral V-SVZ					Dorsal V-SVZ
	# mice	CTL	# mice	Vax1		# mice	CTL	# mice	Vax1
	1	188.373	7	107.417		1	388.91	7	202.94
	2	128.71	8	105.492		2	427.28	8	210.09
	3	166.846	9	149.301		3	342.89	9	236.68
	4	122.372	10	112.081		4	240.96	10	270.3
	5	169.493	11	146.315		5	289.65	11	281.54
	6	172.673	12	81.9036		6	440.81	12	176.54
			13	85.8377				13	161.37
	For each experiment, lateral or dorsal electroporation, animals were from the same litter
	Each value represents the mean of GFP+ cells analysed per animal

## Sheet: Figure 3G
	Figure 3G: Vax1 overexpression leads to reduced number of Pax6+ neurons in the glomerular layer of olfactory bulb
	Pax6+ GFP+ PGC number relative to total GFP+ cells in the glomerular layer at 2 different time points
	15 dpe					25 dpe
	CTL		Vax1OE			CTL		Vax1OE
	# of mice	%	# of mice	%		# of mice	%	# of mice	%
	1	17.8282	7	4.64651		1	14.1842	8	4.66364
	2	22.5655	8	4.56164		2	13.3269	9	3.1814
	3	24.0065	9	3.80571		3	18.2712	10	3.325
	4	21.4012	10	4.08947		4	22.8594	11	2.44286
	5	21.5078	11	3.21739		5	10.5564	12	2.9925
	6	19.8897	12	3.86087		6	20.1119	13	3.42
						7	22.0618
						8	22.5189
	Animals are from the same litter					Animals are from the same litter used at 25 dpe in Figure 4C
	Each value represents the mean of several section analyzed per animal
