# Supplementary material for: Stem cell regionalization during olfactory bulb neurogenesis depends on regulatory interactions between Vax1 and Pax6
Source: eLife. 2020 Aug 7;9:e58215. doi: 10.7554/eLife.58215 (PMC7440913; doi:10.7554/eLife.58215)
Supplement: Figure 4—source data 1. [file elife-58215-fig4-data1.xlsx]

## Sheet: Figure 4B
	Figure 4B: Vax1 overexpression in the dorsal V-SVZ progenitors affects the number of TH+ but not the Calretinin+ neurons in the glomerular layer
	TH+ GFP+ PGC number relative to total GFP+ cells in the OB								CalR+ GFP+ PGC number relative to total GFP+ cells in the OB
	CTL			Vax1OE					CTL			Vax1OE
	# of litter	# of mice	%	# of litter	# of mice	%			# of litter	# of mice	%	# of litter	# of mice	%
	1	1-1	3.56972	1	1-5	0.251584			1	1-1	8.1982	1	1-5	4.39664
		1-2	5.22488		1-7	1.45381				1-2	6.89655		1-6	3.59333
		1-3	4.15842		1-8	1.42486				1-3	7.22581		1-7	3.65547
		1-4	5.0347		1-9	0.80319				1-4	7.7		1-8	3.52917
	2	2-1	6.49206	2	2-7	1.05714			2	2-1	18.8523		1-9	4.12641
		2-2	6.65041		2-8	1.21406				2-2	12.145	2	2-7	12.907
		2-3	9.45813		2-9	1.85				2-3	11.6332		2-8	16.0131
		2-4	5.48993		2-10	0.312676				2-4	10.4354		2-9	13.6814
		2-5	9.64623		2-11	0.15102				2-5	13.2588		2-10	14.1116
		2-6	5.21274	3	3-5	1.38843				2-6	15.2859		2-11	12.591
	3	3-1	5.41667		3-6	1.51807			3	3-1	6.46561	3	3-5	14.6364
		3-3	2.86765		3-7	0.807692				3-2	8.92537		3-6	14.7857
		3-4	4.29358		3-8	1.98113				3-3	8.3301		3-7	13.5484
					3-9	1.35484				3-4	9.75		3-8	10.5
													3-9	14.1522
	Quantification of TH+ GFP+ PGC number related to the total number of GFP+ cells in the OB at P15								Quantification of CalR+ GFP+ PGC number related to the total number of GFP+ cells in the OB at P15
	Each value represents the mean of several section analyzed per animal								Each value represents the mean of several section analyzed per animal
	The same litter was used to electroporate control plasmid or pCX-Vax1 in 3 independent experiments (litters 1, 2 & 3)								The same litter was used to electroporate control plasmid or pCX-Vax1 in 3 independent experiments (liters 1, 2 & 3)
	CTL, n= 13								CTL, n= 14
	Vax1OE, n= 14								Vax1OE, n= 15
	Absence of value for CTL section 3-2 is due to not usable sections
	sections from animal Vax1OE 1-6 were not use for this experiment

## Sheet: Figure 4C
	Figure 4C: The reduction of TH+ PGC number after Vax1 overexpression in dorsal V-SVZ progenitors is maintained with time
	Quantification of TH+ GFP+ PGC number related to the total number of GFP+ cells in the OB at P25 or P60
	25 dpe					60 dpe
	# of mice	CTL	# of mice	Vax1OE		# of mice	CTL	# of mice	Vax1OE
	1	10.6832	8	1.42308		1	6.53125	6	0.419048
	2	6.80851	9	1.70115		2	4.17073	7	0.334177
	3	9	10	1.52577		3	7.53968	8	0
	4	6.21359	11	0.486842		4	7.2381	9	0.776471
	5	7.1875	13	0.961039		5	6.71951
	6	9.62963
	7	9.18919
	Each value represents the mean of several section analyzed per animal
	Mice were from the same litter					Mice were from the same litter
	CTL, n=7					CTL, n=5
	Vax1OE, n= 5					Vax1OE, n= 4

## Sheet: Figure 4D
	Figure 4D: The number of GFP+ PGC is reduced after Vax1 overexpression in dorsal V-SVZ progenitors
	GFP+ PCG number/mm2
	# of litter	# of mice	WT	# of litter	# of mice	Vax1OE
	1	1-1	103.301	1	1-5	66.1411
		1-2	80.1502		1-7	44.8594
		1-3	44.0845		1-8	16.8786
		1-4	131.178		1-9	21.3946
	2	2-1	151.886	2	2-7	26.1728
		2-2	162.896		2-8	48.327
		2-3	160.166		2-9	11.9732
		2-4	192.79		2-10	25.5275
		2-5	148.508		2-11	11.5272
		2-6	111.042	4	4-6	39.0645
	4	4-1	61.8047		4-7	30.5605
		4-2	24.0914		4-8	32.5639
		4-3	43.6739		4-9	64.7305
		4-4	135.674		4-10	28.1022
		4-5	25.0842
	Quantification of the total number of GFP+ periglomerular cells per surface area in OB at 15 dpe
	Litters # 1 & 2 correspond to the same as in Figure 4B
	Each value represents the mean of several section analyzed per animal
	The same litter was used to electroporate control plasmid or pCX-Vax1 in 3 independent experiments (litters 1, 2 & 4)
	CTL, n= 15
	Vax1OE, n= 14

## Sheet: Figure 4F
	Figure 4F: Vax1 overexpression in the lateral V-SVZ progenitors affects the number of TH+ but not Calretinin+ or Calbindin+ cell populations in the glomerular layer
	CTL						Vax1OE
	# of litter	# of mice	% TH	% CalB	% CalR		# of litter	# of mice	% TH	% CalB	% CalR
	1	1-1	1.74234	0.356482	0.0712963		1	1-6	0.814379	1.07661	0.358871
		1-2	2.10598	0.745161	0.165591			1-7	0.494444	0.539394	0.539394
		1-3	2.50127	0.473846	0.236923			1-8	0.741667	0.342308	0
		1-4	2.8875	0.316438	0.527397			1-9	0.391824	0.735537	0.294215
		1-5	2.50698	0.35	0.0875			1-10	0.988889	0.356	0.089
	2	2-1	3.11215	0.990551	0.0582677		2	2-6	0.458333	0.471429	0
		2-2	1.5579	1.0963	0.274074			2-7	0.166667	0.471429	0.0785714
		2-3	2.50847	0.831461	0.0831461			2-8	0.415094
		2-4	1.77885	0.758974	0.0948718			2-9	0.5	0.55	0
		2-5	2.23947	0.850575	0.255172			2-10	0.568966
								2-11	0.34375	0.327381	0.261905
	Quantification of the number of TH+, Calbindin+ or Calretinin+ GFP+ PGC related to the total number of GFP+ cells in the OB at P15
	Each value represents the mean of several section analyzed per animal
	The same litter was used to electroporate control plasmid or pCX-Vax1 in 2 independent experiments (litters 1 & 2)
	CTL, n= 10
	Vax1OE, n= 10 for TH or n=9 for CalB and CalR
	absence of value for Vax1OE animals 2-8 and 2-10 is due to lack of sections

## Sheet: figure 4G
	Figure 4G: The number of GFP+ PGC is not affected after Vax1 overexpression in lateral V-SVZ progenitors
	GFP+ PCG number/mm2
	# of litter	# of mice	WT	# of litter	# of mice	Vax1OE
	1	1-1	21.6058	1	1-6	49.2852
		1-2	21.9632		1-7	15.6959
		1-3	65.8461		1-8	48.9682
		1-4	26.9885		1-9	27.176
		1-5	14.491		1-10	14.586
	2	2-1	47.0843	2	2-6	29.2338
		2-2	17.3927		2-7	10.6077
		2-3	29.0085		2-8	12.2266
		2-4	43.9636		2-9	20.5441
		2-5	35.9884		2-10	23.6847
	Quantification of the total number of GFP+ periglomerular cells per surface area in OB at 15 dpe
	Each value represents the mean of several section analyzed per animal
	The same litter was used to electroporate control plasmid or pCX-Vax1 in 2 independent experiments (litters 1 & 2)
	CTL, n= 10
	Vax1OE, n= 10

## Sheet: Figure 4I
Figure 4I. Vax1 inactivation in lateral V-SVZ progenitors does not affect the percentage of TH+ Periglomerular neurons in P15 OB
	% of TH+ Tom+ cells related to the number of Tom+ PGC
	Vax1;Ai14
	# of litter	# of mice	WT	# of litter	# of mice	mutant
	1	1-1	23.3333	4	4-1	24.5902
		1-2	9.61538		4-2	20.9302
		1-3	23.0769	5	5-1	4.54545
		1-4	14.2857		5-2	9.67742
	2	2-1	5.12821		5-3	15.493
		2-2	7.69231		5-4	16.1765
		2-3	13.4454		5-5	9.61538
		2-4	5.26316		5-6	14.2857
	3	3-1	9.09091		5-7	28.3186
		3-2	21.3333	6	6-1	20
		3-3	10.5263		6-2	20.8333
		3-4	11.4035		6-3	14.4578
	Quantification of TH+ Tom+ PGC number related to the total number of Tom+ cells in the GL at P15
	Each value represents the mean of several section analyzed per animal
	independant litters were used to performed CRE electroporation in WT or Vax1cKO animals
	WT: 3 litters, n=12
	Vax1cKO: 3 litters, n=12
