# Supplementary material for: Stem cell regionalization during olfactory bulb neurogenesis depends on regulatory interactions between Vax1 and Pax6
Source: eLife. 2020 Aug 7;9:e58215. doi: 10.7554/eLife.58215 (PMC7440913; doi:10.7554/eLife.58215)
Supplement: Figure 5—source data 1. [file elife-58215-fig5-data1.xlsx]

## Sheet: Figure 5B
		Figure 5B: Vax1 mRNA expression increases after electroporation of V-SVZ lateral progenitors with pCX-Vax1
		Vax1 mRNA expression (# biological duplicate)
			CTL	Vax1OE
		#1	1	42.9259
		#2	1	44.6939
		Vax1 level	CTL	Vax1OE
		mean	1	43.8099
		SD	0	1.25016
		Each value represents the mean of experimental triplicate
		Vax1 mRNA expression level measured byqRT-PCR was normalized to beta-actin internal control
		Vax1 mRNA level was arbitrary set to 1 in control condition and reported to control in Vax1OE condition

## Sheet: Figure 5C
	Figure 5B: mature miR-7 expression increases in Vax1 overexpressing V-SVZ lateral progenitors
	miR-7a expression (# technical triplicate)
		CTL	Vax1OE
	#1	1	4.9112
	#2	1	7.68932
	#3	1	3.54683
	miR-7 level	CTL	Vax1OE
	mean	1	5.38245
	SD	0	2.11107
	Each value represents the mean of experimental triplicate
	miR-7 expression level measured by qRT-PCR was normalized to let-7a miRNA internal control
	miR-7 level was arbitrary set to 1 in control condition and reported to control in Vax1OE condition
